# Supplementary material for: TRPV1 channel mediates NLRP3 inflammasome-dependent neuroinflammation in microglia
Source: PubMed Central journal article supplement (PMC8671551; doi:10.1038/s41419-021-04450-9), 2021-12-14
Supplement: 41419_2021_4450_MOESM1_ESM.pdf [file 41419_2021_4450_MOESM1_ESM.pdf]

**Fig. S1 CCK8 assay for analyzing the effect of CPZ on cell viability of primary microglia**

Primary mouse microglia were cultured in the presence or absence of 10  $\mu$ M CPZ for indicated time durations. CCK8 assay was performed to measure the effect of CPZ on cell viability of primary microglia.

**Fig.S2 TRPV1 antagonist CPZ ameliorates mice EAE**

C57BL/6 mice (n=12) were immunized with MOG<sub>35-55</sub> to induce EAE. CPZ (30mg/kg) was subcutaneously administrated once a day from day 0 to day 21. Mean clinical scores (A), disease incidence (B) and percentage of mice scoring grade 2<sup>+</sup> from CPZ-treated and vehicle-treated group (C). Representative images of spinal cord sections from CPZ-treated and vehicle-treated mice after EAE induction using hematoxylin and eosin (H&E) (D), luxol fast blue (LFB) (F) and Iba-1 staining (H), and statistical results were shown respectively in (E, G, I). Scale bars: 25  $\mu$ m. Representative images from at least three mice per group are displayed. \* $p < 0.05$ . \*\* $p < 0.01$ . \*\*\* $p < 0.001$ .

**Fig.S3 Systemic inflammation is disrupted in TRPV1-KO mice**

ELISA of IL-1 $\beta$  (A) and TNF- $\alpha$  (B) in the serum of WT and TRPV1-KO mice that were intraperitoneally (i.p.) injected with 10 mg/kg LPS for 4 h. n=3. (C) Survival of WT and TRPV1-KO mice subjected to 5 mg/kg LPS (i.p.) was monitored. n=6. Representative images of Iba-1 immunostaining of brain (D) and spinal cord (F) tissues from WT and TRPV1-KO mice subjected to 5 mg/kg LPS (i.p.) for 48 h, and statistical results were summarized respectively in (E, G). Scale bars: 50  $\mu$ m. Representative images from at least three mice per group are displayed. \* $p < 0.05$ . \*\*\* $p < 0.001$ .

**Fig. S4 IL-1 $\beta$  expression in the spinal cord tissues of ctrl and EAE mice from two genotypes**

WT and TRPV1-KO (KO) mice were immunized with MOG<sub>35-55</sub> to induce EAE. Mice were sacrificed in the peak phase of disease and the spinal cord tissues were homogenized to extract protein for western blot assay of IL-1 $\beta$ .

**Fig.S5 CPZ blocks NLRP3 inflammasome activation in EAE mice**

(A-B) Serum cytokines, IL-1 $\beta$  (A) and TNF- $\alpha$  (B) from CPZ-treated and vehicle-treated EAE mice were analyzed by cytometric bead array (CBA). (C) The representative image of immunofluorescence staining of Iba-1 and ASC from spinal cord tissue of each group, and statistical results were summarized in (D). (E) Western blot assay for IL-1 $\beta$  p17, casp-1 p10, NLRP3 and p-PP2A from the spinal cord tissues of each group and statistical results were summarized in (F). Representative images from at least three mice per group are displayed. Scale bars: 25  $\mu$ m. \* $p < 0.05$ . \*\* $p < 0.01$ . \*\*\* $p < 0.001$ .
